# Supplementary material for: Theropod Tridactyl Tracks Across the Triassic–Jurassic Boundary in Southern Africa: Implications for Pedal Morphology Evolution
Source: Frontiers journal article supplement (doi:10.3389/fevo.2022.925313), 2022-06-30
Supplement: Table_3.XLSX [file Table_3.XLSX]

## Sheet: Sheet1
	Small	Medium	Large	Mega
TL_meansd	10.90 (4.10)	20.64 (2.83)	30.65 (4.00)	42.06 (1.93)
TW_meansd	8.40 (4.58)	16.19 (3.40)	21.76 (3.99)	30.77 (4.51)
TS_meansd	7.97 (4.42)	15.69 (3.30)	21.16 (4.38)	30.99 (4.48)
Dp_meansd	4.76 (1.83)	8.48 (1.54)	10.54 (2.69)	15.53 (1.07)
LII_meansd	5.80 (2.18)	10.97 (2.39)	16.74 (4.03)	22.52 (2.29)
LIII_meansd	7.79 (3.07)	14.36 (2.26)	20.65 (3.71)	25.80 (2.53)
LIV_meansd	6.71 (2.75)	12.61 (2.33)	18.91 (4.04)	26.25 (2.76)
TL/TW_meansd	1.43 (0.40)	1.31 (0.21)	1.43 (0.14)	1.39 (0.19)
Dp/TS_meansd	0.65 (0.15)	0.55 (0.12)	0.51 (0.12)	0.51 (0.07)
Dp/TL_meansd	0.44 (0.02)	0.41 (0.05)	0.34 (0.07)	0.37 (0.03)
DP/(TL-DP)_mean sd	0.77(0.02)	0.75(0.03)	0.62(0.03)	0.57(0.02)
TL_medianq	13.50 (6.55,14.30)	21.35 (18.25,22.65)	29.00 (27.95,34.00)	41.00 (40.80,44.00)
TW_medianq	7.40 (5.00,11.05)	16.15 (13.25,18.25)	21.00 (18.50,24.00)	31.05 (26.90,33.75)
TS_medianq	7.20 (4.50,10.20)	15.85 (13.03,17.17)	21.00 (17.30,23.70)	31.20 (27.62,33.00)
Dp_medianq	5.60 (2.90,6.25)	8.40 (7.32,9.38)	10.20 (8.70,11.75)	15.50 (14.88,16.25)
LII_medianq	6.50 (3.80,7.40)	10.75 (9.18,12.75)	15.50 (14.05,18.50)	22.05 (20.55,24.17)
LIII_medianq	8.70 (4.85,10.35)	14.90 (12.53,16.20)	20.50 (18.40,22.55)	25.60 (24.25,27.33)
LIC_medianq	8.00 (4.00,8.00)	12.50 (11.00,14.00)	20.00 (17.00,21.00)	25.50 (24.00,28.50)
TL/TW_medianq	1.39 (1.22,1.62)	1.32 (1.16,1.46)	1.43 (1.31,1.53)	1.32 (1.29,1.56)
Dp/TS_medianq	0.63 (0.59,0.71)	0.53 (0.47,0.60)	0.50 (0.45,0.58)	0.49 (0.45,0.55)
Dp/TL_medianq	0.43 (0.42,0.44)	0.41 (0.37,0.45)	0.34 (0.31,0.39)	0.37 (0.35,0.38)
DP/(TL-DP)_medianq	0.76	0.71	0.55	0.56
	(0.72,0.82)	(0.59, 0.86)	(0.48, 0.7)	(0.5,0.63)
